# Supplementary material for: Copper is an intestinal habitat filter affecting the gut microbiota interactions with Salmonella Typhimurium
Source: Research Square preprint supplement (doi:10.21203/rs.3.rs-7197766/v1), 2025-09-19
Supplement: Supplementary file 3 [file be93df3c9ef4bfab5dc0b428.xlsx]

## Sheet: Sheet 1
user_genome
